# Supplementary material for: Transcriptome and venom proteome of the box jellyfish Chironex fleckeri
Source: PubMed Central journal article supplement (PMC4445812; doi:10.1186/s12864-015-1568-3), 2015-05-27
Supplement: 12864_2015_1568_MOESM1_ESM.pdf [file 12864_2015_1568_MOESM1_ESM.pdf]

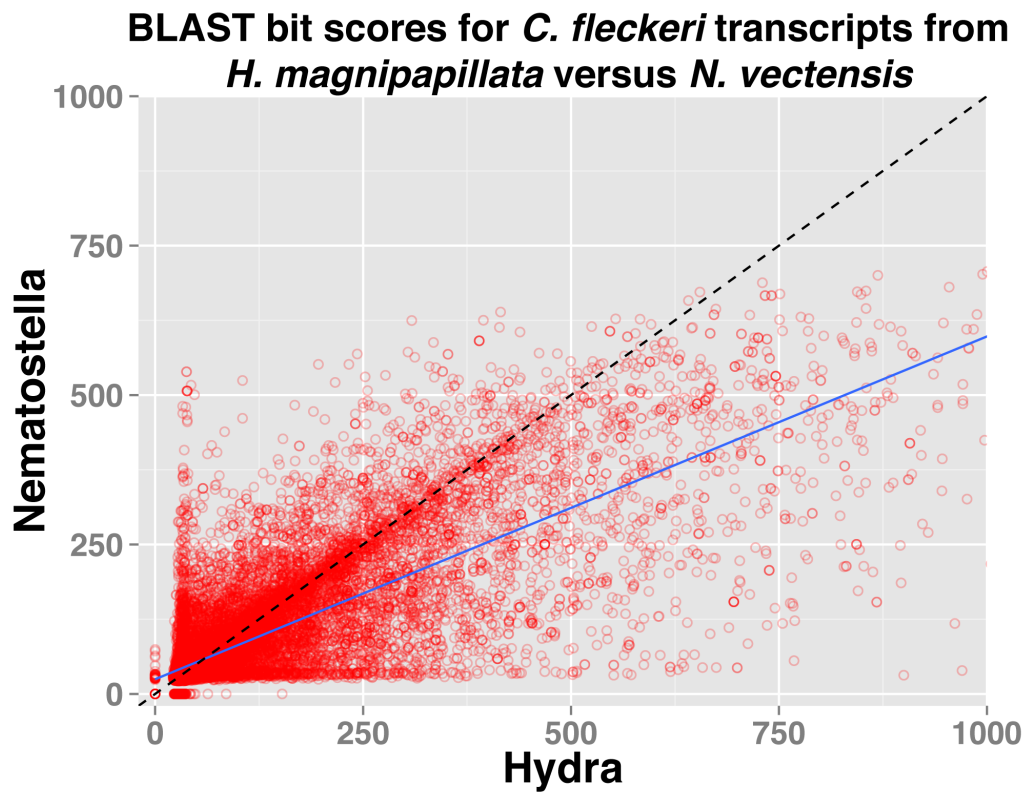

**Supplementary Figure 1: Comparison of *C. fleckeri* transcripts to *H. magnipapillata* and *N. vectensis*.** Bit scores from searches of the assembled transcripts against databases containing *H. magnipapillata* and *N. vectensis* proteins using blastx. Solid line is the best simple linear regression model which suggests that generally *C. fleckeri* protein products possess more sequence homology to *H. magnipapillata* than *N. vectensis*.  $Y = X$  is shown as a dotted line.
